# Supplementary material
Source: PubMed Central journal article supplement (PMC3993681)
Supplement: JCM.03355-13_zjm999093323so1.pdf [file JCM.03355-13_zjm999093323so1.pdf]

**TABLE S1. Strains included in the UCSC yeast database**

| <b>Genus</b>          | <b>Species</b>         | <b>Strain<sup>a</sup></b>                                                                                                                                                                       |
|-----------------------|------------------------|-------------------------------------------------------------------------------------------------------------------------------------------------------------------------------------------------|
| <i>Blastobotrys</i>   | <i>adeninivorans</i>   | UCSC121211, UCSC172-23                                                                                                                                                                          |
| <i>Candida</i>        | <i>albicans</i>        | ATCC10231, DSP1012, DSP1013, DSP1007, UCSC9850, UCSC78-230113, UCSC38-180213, UCSC36-180213, UCSC25-180213, UCSC11-180213, UCSC4-180213, UCSC11-230113, UCSC72-230113, UCSC76-230113            |
|                       | <i>bracarensis</i>     | UCSC170211, UCSC107-311013                                                                                                                                                                      |
|                       | <i>catenulata</i>      | UCSC62-030113                                                                                                                                                                                   |
|                       | <i>dublinsiensis</i>   | UCSC219-1803, UCSC100-140213, UCSC72-080213, UCSC73-080213                                                                                                                                      |
|                       | <i>glabrata</i>        | DSY562, DSP39, DSP41, DSP25, DSP155, UCSC40-030513                                                                                                                                              |
|                       | <i>guilliermondii</i>  | UCSC134-250811, UCSC227-15, UCSC42-050313                                                                                                                                                       |
|                       | <i>inconspicua</i>     | UCSC18-010811, UCSC89-070113, UCSC64-050213                                                                                                                                                     |
|                       | <i>kefyr</i>           | UCSC6a-260711                                                                                                                                                                                   |
|                       | <i>krusei</i>          | ATCC6258, DSP1023, DSP45, UCSC6b-260711, UCSC083122, UCSC101-090113, UCSC53-290113, UCSC51-290113                                                                                               |
|                       | <i>lambica</i>         | UCSC107-100811                                                                                                                                                                                  |
|                       | <i>lusitaniae</i>      | UCSC60b-250711, UCSC111-250811, UCSC113-250811, UCSC47-17, UCSC72-6                                                                                                                             |
|                       | <i>metapsilosis</i>    | UCSC11-592903, ATCC96143, UCSC51-030412, UCSC34a-020712, UCSC137-080213                                                                                                                         |
|                       | <i>nivariensis</i>     | UCSC54-030112, UCSC59-0712, UCSC67-071112                                                                                                                                                       |
|                       | <i>norvegensis</i>     | UCSC62-050213, UCSC51-080911                                                                                                                                                                    |
|                       | <i>orthopsilosis</i>   | ATCC96139, UCSC67-110412, UCSC58-160412, UCSC45-040912, UCSC103-170812                                                                                                                          |
|                       | <i>palmioloephila</i>  | UCSC24-22                                                                                                                                                                                       |
|                       | <i>parapsilosis</i>    | ATCC22019, UCSC63-080911, UCSC135-250811, UCSC93-210312, UCSC5-070512, UCSC5-250612, UCSC51-050612, UCSC72-100712, UCSC75-280312, UCSC97-200612, UCSC99-250712                                  |
|                       | <i>pararugosa</i>      | UCSC107-080911, UCSC81a-261011                                                                                                                                                                  |
|                       | <i>pelliculosa</i>     | UCSC61-251011, UCSC122-080213                                                                                                                                                                   |
|                       | <i>rugosa</i>          | UCSC39-24, UCSC22-040413                                                                                                                                                                        |
|                       | <i>sorbosa</i>         | UCSC90-121012                                                                                                                                                                                   |
|                       | <i>sphaerica</i>       | UCSC124-111011                                                                                                                                                                                  |
|                       | <i>tropicalis</i>      | DSP57, DSP73, DSP80, UCSC130-290711, UCSC7-031011, UCSC102-090113, UCSC43-0513, UCSC33-280113, UCSC15-280113                                                                                    |
|                       | <i>utilis</i>          | UCSC74                                                                                                                                                                                          |
| <i>Cryptococcus</i>   | <i>neoformans</i>      | H99, IUM01-3216, IUM00-5361, IUM 97-3995, IUM98-4497/2, ATCC MYA-4565, ATCC MYA-565, IUM99-0453, IUM94-0047, IUM94-6311, IUM95-2410, IUM99-5691, IUM99-5674, IUM95-6038, IUM02-1098, CR13, CR21 |
|                       | <i>gattii</i>          | ATCC32269, WM201, ATCC32609, NIH198, ATCC32608, ATCC34880, NIH114, NIH118                                                                                                                       |
| <i>Exophiala</i>      | <i>dermatitidis</i>    | UCSC145, UCSC845                                                                                                                                                                                |
| <i>Geotrichum</i>     | <i>candidum</i>        | UCSC626, UCSC2-050911                                                                                                                                                                           |
|                       | <i>capitatum</i>       | UCSC106-130412, UCSC243-11                                                                                                                                                                      |
|                       | <i>gigas</i>           | UCSC8b-150711                                                                                                                                                                                   |
|                       | <i>silvicola</i>       | UCSC182                                                                                                                                                                                         |
| <i>Lodderomyces</i>   | <i>elongisporus</i>    | LE622                                                                                                                                                                                           |
| <i>Pichia</i>         | <i>caribbica</i>       | UCSC2-071111                                                                                                                                                                                    |
|                       | <i>manshurica</i>      | UCSC90-270711                                                                                                                                                                                   |
|                       | <i>membranifaciens</i> | UCSC37-4                                                                                                                                                                                        |
|                       | <i>onychis</i>         | UCSC11-130212                                                                                                                                                                                   |
|                       | <i>terricola</i>       | UCSC46-200813                                                                                                                                                                                   |
| <i>Rhodotorula</i>    | <i>dairiensis</i>      | UCSC110-050112                                                                                                                                                                                  |
|                       | <i>mucilaginoso</i>    | UCSC26-011011                                                                                                                                                                                   |
| <i>Trichomonascus</i> | <i>ciferii</i>         | UCSC231111                                                                                                                                                                                      |
| <i>Trichosporon</i>   | <i>asahii</i>          | UCSC114-250811, UCSC45-241011                                                                                                                                                                   |
|                       | <i>asteroides</i>      | UCSC11-502803                                                                                                                                                                                   |
|                       | <i>coremiiforme</i>    | UCSC30-31                                                                                                                                                                                       |
|                       | <i>debeurmannianum</i> | UCSC1                                                                                                                                                                                           |
|                       | <i>inkin</i>           | UCSC11-993103, UCSC1-260911, UCSC145-211112, UCSC3-151111                                                                                                                                       |
|                       | <i>mucoides</i>        | UCSC2-1810414                                                                                                                                                                                   |
| <i>Saccharomyces</i>  | <i>cerevisiae</i>      | UCSC60a-250711, UCSC56-090811, UCSC082422, UCSC090723, UCSC091323, UCSC61-050213, UCSC54-050213, UCSC59-290113, UCSC18-280113                                                                   |

<sup>a</sup>A total of 156 yeast strains were used. With the exception of the reference-type strains, those from the other collections were identified molecularly, based on ITS1-5.8S-ITS2 gene sequence comparison.

Abbreviations: ATCC, American Type Culture Collection (Manassas, VA, USA); DSP, culture strain collection of the New Jersey Medical School (Newark, New Jersey); H; *C. neoformans* var. *grubii* H99, Duke University Medical Center (Durham, North Carolina); IUM, culture strain collection of the Università degli Studi di Milano (Milan, Italy); LE, culture strain collection of the Università degli Studi di Pisa (Pisa, Italy); NIH, National Institutes of Health (Bethesda, Maryland); UCSC and CR, culture strain collections of the Università Cattolica del Sacro Cuore (Rome, Italy); WM, culture strain collection of the Westmead Millenium Institute (Sydney, Australia).
